# Supplementary material
Source: publisher figshare collection journal article supplement (https://geolsoc.figshare.com/ndownloader/files/30955361)
Supplement: Supplementary file 1 [file 30955361]

## Sheet: Clinopyroxene
Appendix A: EPMA of clinopyroxene
Sample no.	STKH/16/03	STKH/16/03	STKH/16/03	STKH/16/03	STKH/16/03	STKH/16/03	STKH/16/04	STKH/16/04	STKH/16/04	STKH/16/04	STKH/16/04	STKH/16/04	STKH/19/27	STKH/19/27	STKH/19/27	STKH/19/27	STKH/19/27	STKH/19/27	STKH/19/27	STKH/19/27	STKH/19/27
DataSet/Point	61 / 1 .	65 / 1 .	73 / 1 .	74 / 1 .	75 / 1 .	79 / 1 .	40 / 1 .	41 / 1 .	42 / 1 .	46 / 1 .	51 / 1 .	55 / 1 .	4 / 1 .	5 / 1 .	6 / 1 .	15 / 1 .	16 / 1 .	18 / 1 .	26 / 1 .	35 / 1 .	39 / 1 .
SiO2	50.199	51.11	51.992	51.351	51.826	50.361	52.625	52.184	52.459	50.849	52.631	51.618	52.044	51.087	50.895	51.204	51.811	52.171	50.206	49.983	50.643
TiO2	0.709	0.769	0.472	0.487	0.412	0.285	0.418	0.331	0.431	0.737	0.381	0.667	0.574	0.593	0.606	0.574	0.481	0.348	0.689	0.516	0.596
Al2O3	1.848	2.211	1.864	1.843	1.56	1.989	1.499	1.337	1.694	1.717	1.856	2.549	2.259	2.204	2.216	2.321	2.053	0.74	1.492	2.127	2.157
V2O3	0.059	0.107	0.038	0.052	0	0.039	0	0.074	0	0.095	0	0.059	0.048	0.038	0.062	0.034	0.124	0.019	0.067	0.064	0.019
Cr2O3	0.02	0.088	0.329	0.53	0.351	0.117	0.432	0.681	0.405	0.02	0.541	0.255	0.26	0.136	0.048	0.348	0.442	0.023	0	0.263	0.123
Fe2O3	3.52824	1.90022	2.43201	3.56755	2.86841	4.07787	2.11428	2.89713	1.16334	2.36322	2.26347	2.05585	2.10932	2.23197	2.69892	3.56615	2.99309	2.26673	3.84909	6.30084	3.86124
FeO	12.5521	11.1151	7.60056	7.28275	7.85987	11.1465	7.58547	7.20102	8.49517	12.6255	6.57722	8.48305	7.82994	8.45857	8.27439	6.29701	7.43368	11.1303	9.85941	6.10821	6.57848
MnO	0.295	0.36	0.25	0.242	0.119	0.167	0.303	0.146	0.206	0.33	0.163	0.239	0.197	0.142	0.234	0.233	0.134	0.242	0.352	0.309	0.22
MgO	14.212	14.763	16.196	17.091	16.898	13.467	17.185	17.322	16.553	13.554	16.654	15.541	17.056	15.824	15.931	16.468	16.759	13.324	14.086	16.267	16.467
NiO	0	0.045	0.047	0.143	0.085	0	0	0.086	0.024	0.123	0.098	0	0.086	0	0	0.028	0	0.121	0.023	0	0
ZnO	0	0	0	0.103	0	0.047	0	0	0	0	0	0.193	0	0	0.034	0	0.027	0	0	0.011	0
CaO	16.49	17.509	19.033	17.483	18.041	18.347	18.327	17.994	18.464	17.838	19.101	18.878	18.074	18.399	18.077	18.994	18.314	20.035	18.508	18.1	18.364
Na2O	0.273	0.331	0.292	0.263	0.225	0.326	0.265	0.281	0.263	0.296	0.453	0.321	0.232	0.267	0.281	0.322	0.313	0.379	0.322	0.348	0.304
K2O	0.028	0	0.028	0	0	0.031	0.022	0.01	0.002	0	0.059	0.016	0	0	0	0	0.001	0.009	0.033	0	0
Total	100.213	100.308	100.574	100.438	100.245	100.4	100.776	100.544	100.16	100.548	100.778	100.875	100.769	99.3805	99.3573	100.389	100.886	100.808	99.4865	100.397	99.3327
Oxygen (pfu)	6	6	6	6	6	6	6	6	6	6	6	6	6	6	6	6	6	6	6	6	6
Si	1.89795	1.91197	1.91835	1.89763	1.91752	1.90013	1.93055	1.92096	1.93851	1.91653	1.92787	1.90478	1.90995	1.91044	1.90462	1.88999	1.90379	1.95524	1.90371	1.85853	1.89048
Ti	0.0201668	0.0216422	0.0131019	0.0135392	0.0114681	0.00808972	0.0115363	0.00916663	0.0119819	0.0208978	0.0104993	0.0185169	0.0158476	0.0166831	0.0170611	0.0159392	0.0132967	0.00981183	0.0196546	0.0144343	0.0167378
Al	0.0823471	0.0974808	0.0810573	0.0802682	0.0680257	0.0884462	0.0648106	0.0580054	0.0737762	0.0762711	0.0801254	0.110858	0.0977063	0.0971383	0.097737	0.100969	0.0889083	0.0326857	0.0666759	0.0932116	0.0948983
V	0.00178849	0.00320924	0.00112413	0.00154067	0	0.00117977	0	0.00218402	0	0.00287079	0	0.00174557	0.00141233	0.00113933	0.00186024	0.00100619	0.00365311	0.000570911	0.00203687	0.00190797	0.000568656
Cr	0.000597855	0.00260275	0.00959759	0.0154851	0.0102677	0.0034902	0.0125299	0.01982	0.0118325	0.00059599	0.0156678	0.00743975	0.00754396	0.00402103	0.0014202	0.0101557	0.0128409	0.000681513	0	0.00773175	0.00363022
Fe3+	0.100389	0.0534952	0.0675294	0.0992131	0.0798675	0.115787	0.0583697	0.0802577	0.0323512	0.067031	0.0623948	0.0570913	0.0582546	0.0628127	0.0760081	0.0990583	0.0827664	0.0639303	0.109835	0.176312	0.108471
Fe2+	0.396895	0.347741	0.234533	0.225074	0.243207	0.35172	0.232723	0.221689	0.262535	0.397969	0.201487	0.261796	0.240313	0.264538	0.258963	0.194383	0.228438	0.348855	0.312653	0.189945	0.205374
Mn	0.00944709	0.0114068	0.00781298	0.00757467	0.00372928	0.00533692	0.00941492	0.00455219	0.00644763	0.010535	0.0050572	0.0074701	0.00612354	0.00449777	0.00741711	0.00728445	0.0041705	0.00768196	0.0113051	0.00973175	0.00695602
Mg	0.80104	0.823299	0.890855	0.941539	0.932044	0.757475	0.939824	0.950579	0.911869	0.76157	0.909418	0.854929	0.933118	0.882161	0.888761	0.90616	0.918024	0.744413	0.796234	0.901702	0.91638
Ni	0	0.00135416	0.00139499	0.0042509	0.00252984	0	0	0.00254661	0.000713413	0.00372925	0.00288765	0	0.00253882	0	0	0.000831372	0	0.00364786	0.000701543	0	0
Zn	0	0	0	0.00280991	0	0.00130912	0	0	0	0	0	0.00525767	0	0	0.000939302	0	0.00073241	0	0	0.000301948	0
Ca	0.668012	0.701793	0.752439	0.692232	0.715198	0.741698	0.720366	0.709712	0.731049	0.720366	0.749662	0.7464	0.710687	0.737209	0.724824	0.751181	0.721031	0.804513	0.751929	0.721105	0.734502
Na	0.0200124	0.0240076	0.0208891	0.0188437	0.0161407	0.0238481	0.0188487	0.0200556	0.018843	0.0216308	0.0321723	0.0229665	0.0165077	0.0193589	0.0203886	0.023044	0.0222992	0.0275395	0.0236727	0.0250884	0.0220025
K	0.00135054	0	0.00131798	0	0	0.00149214	0.0010296	0.000469613	9.42835e-05	0	0.00275706	0.000753219	0	0	0	0	4.68766e-05	0.0004303	0.00159631	0	0
Total	4	4	4	4	4	4	4	4	4	4	4	4	4	4	4	4	4	4	4	4	4
%En	40.5429	42.4877	45.6107	47.9001	47.2149	38.4112	47.9332	48.3315	46.9008	38.9058	47.1685	44.35	47.8891	45.2108	45.4383	46.2783	46.9714	37.7991	40.1741	45.1122	46.477
%Fs	20.088	17.9457	12.0078	11.4505	12.3202	17.8355	11.8694	11.2716	13.5031	20.3308	10.4505	13.5808	12.3333	13.5576	13.2396	9.92729	11.6882	17.7138	15.775	9.50299	10.4162
%Wo	33.81	36.2172	38.524	35.2167	36.2301	37.6111	36.7403	36.0848	37.6005	36.8008	38.8825	38.72	36.4736	37.782	37.057	38.3634	36.8921	40.8508	37.9387	36.077	37.2525
XMg	0.668684	0.70305	0.791598	0.80707	0.793059	0.682905	0.801524	0.810889	0.776452	0.656787	0.818628	0.765568	0.795205	0.769305	0.774368	0.823375	0.800745	0.680906	0.718048	0.826001	0.816917

## Sheet: Orthopyroxene
Appendix A: EPMA of orthopyroxene
Sample no.	STKH/19/27	STKH/19/27	STKH/19/27	STKH/19/27	STKH/19/27
DataSet/Point	3 / 1 .	19 / 1 .	27 / 1 .	34 / 1 .	41 / 1 .
SiO2	52.6	53.367	51.766	52.979	52.906
TiO2	0.371	0.28	0.232	0.318	0.281
Al2O3	1.025	1.081	0.957	1.193	1.04
V2O3	0.014	0.029	0	0	0.044
Cr2O3	0.037	0	0.076	0.07	0.055
Fe2O3	2.21604	2.3237	3.94705	3.21456	2.66656
FeO	18.8389	15.512	15.5673	13.1614	13.6505
MnO	0.374	0.16	0.523	0.367	0.239
MgO	22.992	25.387	24.075	26.117	26.017
NiO	0.015	0	0.053	0.076	0.207
ZnO	0	0.133	0	0.416	0
CaO	2.156	2.188	2.195	2.307	2.276
Na2O	0.054	0.042	0.05	0.02	0.028
K2O	0	0.007	0	0.019	0
Total	100.693	100.51	99.4413	100.258	99.4101
Oxygen (pfu)	6	6	6	6	6
Si	1.93793	1.93866	1.91828	1.92207	1.93279
Ti	0.0102831	0.00765223	0.00646779	0.00867947	0.00772299
Al	0.0445073	0.0462819	0.0417961	0.0510108	0.0447783
V	0.000413545	0.00084464	0	0	0.00128877
Cr	0.00107778	0	0.00222667	0.00200789	0.00158861
Fe3+	0.0614419	0.0635253	0.110072	0.0877656	0.0733106
Fe2+	0.580464	0.471266	0.482445	0.399333	0.417057
Mn	0.011671	0.00492306	0.0164155	0.0112776	0.00739541
Mg	1.26281	1.37483	1.32997	1.41253	1.41692
Ni	0.000444554	0	0.00157989	0.002218	0.00608319
Zn	0	0.00356676	0	0.0111417	0
Ca	0.0851085	0.0851628	0.0871516	0.0896781	0.089089
Na	0.00385738	0.00295819	0.0035924	0.00140683	0.00198328
K	0	0.000324404	0	0.000879383	0
Total	4	4	4	4	4
%En	63.0933	68.7516	65.6434	70.6059	70.7126
%Fs	29.0016	23.5667	23.812	19.9608	20.8136
%Wo	4.25226	4.25876	4.30154	4.4826	4.44607
XMg	0.68509	0.744723	0.733811	0.779601	0.772594

## Sheet: Plagioclase
Appendix A: EPMA of plagioclase
Sample no.	STKH/16/03	STKH/16/03	STKH/16/04	STKH/19/27	STKH/19/27	STKH/19/27	STKH/19/27	STKH/19/27	STKH/19/27	STKH/19/27
DataSet/Point	64 / 1 .	80 / 1 .	56 / 1 .	7 / 1 .	8 / 1 .	9 / 1 .	17 / 1 .	28 / 1 .	36 / 1 .	40 / 1 .
SiO2	58.813	63.901	60.487	53.598	56.104	56.863	55.878	56.432	54.604	54.568
TiO2	0.061	0.001	0.076	0.066	0.071	0.038	0.081	0.081	0.065	0.077
Al2O3	24.639	22.329	24.223	27.903	26.349	26.788	25.811	24.721	25.884	26.246
V2O3	0	0	0	0.011	0	0.002	0.006	0	0	0
Cr2O3	0.036	0.008	0	0	0.048	0.071	0	0	0	0.019
Fe2O3	0.518748	0.34228	0.287827	0.573431	0.536898	0.696785	0.687895	0.703453	0.813472	0.76124
FeO	0.256206	0	0	0	0.183874	0	0	0	0	0
MnO	0.01	0	0.024	0	0	0	0	0.021	0.011	0.088
MgO	0.035	0.06	0.024	0.074	0.072	0.04	0.062	0.041	0.074	0.069
NiO	0.062	0.056	0	0.075	0.047	0.032	0.01	0	0.076	0.099
ZnO	0	0	0	0	0	0.219	0	0.073	0	0
CaO	7.434	2.209	6.79	11.285	9.839	9.744	9.338	8.258	10.037	10.347
Na2O	7.023	9.501	7.873	4.995	5.786	5.974	6.106	6.737	5.694	5.732
K2O	0.46	1.233	0.336	0.251	0.334	0.313	0.366	0.515	0.27	0.302
Total	99.348	99.6403	100.121	98.8314	99.3708	100.781	98.3459	97.5825	97.5285	98.3082
Oxygen(pfu)	8	8	8	8	8	8	8	8	8	8
Si	2.65378	2.82804	2.69229	2.45321	2.54697	2.54501	2.55634	2.59201	2.52585	2.50338
Ti	0.00207072	3.3295e-05	0.00254491	0.00227264	0.00242487	0.00127951	0.00278781	0.00279895	0.00226202	0.00265754
Al	1.3103	1.16467	1.2707	1.5052	1.40977	1.41305	1.39168	1.33824	1.41114	1.41908
V	0	0	0	0.000403667	0	7.17685e-05	0.000220076	0	0	0
Cr	0.00128431	0.000279926	0	0	0.00172284	0.00251243	0	0	0	0.000689155
Fe3+	0.0176151	0.063767	0.038149	0.0413594	0.0183425	0.0280675	0.052804	0.102293	0.0592546	0.0956849
Fe2+	0.00966828	0	0	0	0.00698099	0	0	0	0	0
Mn	0.000382188	0	0.000904808	0	0	0	0	0.000816988	0.000430984	0.00341945
Mg	0.00235433	0.00395857	0.0015925	0.00504925	0.00487271	0.00266888	0.00422842	0.00280739	0.00510297	0.00471895
Ni	0.00225043	0.00199365	0	0.0027614	0.00171636	0.00115211	0.000368011	0	0.00282799	0.00365347
Zn	0	0	0	0	0	0.00723598	0	0.00247529	0	0
Ca	0.359407	0.104748	0.323819	0.553428	0.478579	0.467273	0.457726	0.406405	0.497462	0.508599
Na	0.614413	0.815257	0.679433	0.44327	0.509278	0.518409	0.541604	0.599962	0.510678	0.509849
K	0.0264794	0.0696146	0.0190791	0.0146561	0.0193435	0.0178716	0.0213608	0.030177	0.0159333	0.0176748
Total	5	5.05237	5.02851	5.02161	5	5.0046	5.02912	5.07798	5.03094	5.0694
An	35.9299	10.5847	31.6746	54.7215	47.5158	46.5618	44.8447	39.2077	48.5768	49.0868
Ab	61.4229	82.3808	66.4592	43.8294	50.5637	51.6573	53.0625	57.881	49.8673	49.2074
Or	2.64714	7.03447	1.86623	1.44916	1.92052	1.78083	2.09278	2.91131	1.55587	1.70586

## Sheet: Amphiboles
APPENDIX A: EPMA of Amphibole
Sample no.	STKH/16/03	STKH/16/03	STKH/16/03	STKH/16/04	STKH/16/04	STKH/19/27	STKH/19/27
DataSet/Point	72 / 1 .	81 / 1 .	84 / 1 .	45 / 1 .	52 / 1 .	1 / 1 .	31 / 1 .
SiO2	46.455	46.835	50.249	46.589	47.808	49.663	48.29
TiO2	1.414	1.217	0.827	1.321	1.245	1.062	1.237
Al2O3	5.571	4.725	4.334	5.466	5.016	4.388	4.311
Cr2O3	0	0.04	0.151	0	0.029	0	0
FeO	19.566	19.726	12.161	18.112	18.206	14.773	15.485
MnO	0.117	0.086	0.113	0.211	0.136	0.1	0.237
MgO	11.525	11.207	16.462	12.054	11.621	14.216	14.285
CaO	10.567	10.766	11.195	10.625	10.711	10.96	10.888
Na2O	1.742	1.368	0.901	1.751	1.431	1.351	1.254
K2O	0.697	0.481	0.237	0.732	0.58	0.402	0.387
Total	97.654	96.451	96.63	96.861	96.783	96.915	96.374
Oxygen (pfu)	23	23	23	23	23	23	23
Si	7.03015	7.16489	7.34236	7.06495	7.22043	7.34002	7.22933
Al (IV)	0.969854	0.835106	0.657643	0.935054	0.779574	0.659977	0.760863
Ti	0	0	0	0	0	0	0.0098086
Sum T	8	8	8	8	8	8	8
Al (VI)	0.0240691	0.0170688	0.0889515	0.0421439	0.113541	0.104595	0
Ti	0.16093	0.140018	0.0908801	0.150655	0.141412	0.118044	0.129464
Fe3+	0	0	0	0	0	0	0
Cr	0	0.00483761	0.0174428	0	0.00346252	0	0
Mg	2.59929	2.55511	3.58486	2.7242	2.6157	3.13129	3.18715
Fe2+	2.21571	2.28296	1.21786	2.08301	2.12589	1.64607	1.68338
Mn	0	0	0	0	0	0	0
Li	0	0	0	0	0	0	0
Sum C	5	5	5	5	5	5	5
Mg	0	0	0	0	0	0	0
Fe2+	0.260623	0.240832	0.268252	0.214028	0.173712	0.179965	0.25539
Mn	0.0149978	0.0111442	0.0139861	0.0271031	0.0173985	0.0125192	0.0300539
Li	0	0	0	0	0	0	0
Ca	1.71348	1.74802	1.71776	1.72643	1.73335	1.73568	1.71456
Na	0.0109045	0	0	0.0324406	0.0755382	0.0718381	0
Sum B	2	2	2	2	2	2	2
Na	0.50026	0.405794	0.255278	0.482423	0.343528	0.315331	0.364015
K	0.134569	0.0938784	0.0441812	0.141618	0.111756	0.0758005	0.0739151
Ca	0	0.0167449	0.0350143	0	0	0	0.0320024
Sum A	0.634829	0.516418	0.334474	0.624041	0.455284	0.391131	0.469932
Total	15.6348	15.5164	15.3345	15.624	15.4553	15.3911	15.4699
XMg	0.51918	0.510597	0.752737	0.555915	0.569724	0.672158	0.624297
Group	Calcic	Calcic	Calcic	Calcic	Calcic	Calcic	Calcic
Sub-group	Edenite	Magnesiohornblende	Magnesiohornblende	Edenite	Magnesiohornblende	Magnesiohornblende	Edenite
